# Supplementary material
Source: PubMed Central journal article supplement (PMC5243180)
Supplement: NIHMS810269-supplement-supplement_1.pdf [file NIHMS810269-supplement-supplement_1.pdf]

**SUPPLEMENTARY APPENDIX****Table S1. Diagnoses, Procedures and the Associated ICD-9 CM Codes**

| <b>Diagnosis or Procedure</b>               | <b>ICD-9 CM code</b>                                                                |
|---------------------------------------------|-------------------------------------------------------------------------------------|
| Antepartum hemorrhage                       | 641.1x – 641.9x                                                                     |
| Blood transfusion                           | 99.03, 99.04                                                                        |
| Chronic anemia                              | 280.x; 281.x; 282.x; 285.2x; 285.3; 285.8;<br>285.9                                 |
| Diabetes, pre-existing or gestational       | 250.x; 648.0x; 648.8x                                                               |
| Obesity                                     | 278.0x                                                                              |
| Hereditary or acquired coagulation disorder | 286.x                                                                               |
| Grand multiparity                           | 659.4x; V23.3x                                                                      |
| Thrombocytopenia                            | 287.5                                                                               |
| Pre-eclampsia or eclampsia                  | 642.4x – 642.7x                                                                     |
| Labor or induction of labor                 | 649.8; 652.1x; 653.x; 656.3x; 659.0-659.1x;<br>660-663.x; 665.1x; 73.01; 73.1; 73.4 |
| Postpartum hemorrhage                       | 666.0x; 666.1x; 666.2x                                                              |

**Table S2. Proportions with Severe Postpartum Anemia According to Each Characteristic and Adjusted Odds Ratios in the Final Multivariable Model.**

| Patient Characteristics                      | Proportion with Severe Postpartum Anemia (%) | Adjusted OR (95% CI)* |
|----------------------------------------------|----------------------------------------------|-----------------------|
| Maternal age (y):                            |                                              |                       |
| <20                                          | 13.6                                         | Reference             |
| 20-34                                        | 7.3                                          | 0.72 (0.61 – 0.85)    |
| ≥35                                          | 6.7                                          | 0.72 (0.6 – 0.85)     |
| Race/ethnicity:                              |                                              |                       |
| White                                        | 5.6                                          | Reference             |
| Black                                        | 8.4                                          | 1.16 (1.02 – 1.31)    |
| Hispanic                                     | 8.3                                          | 1.4 (1.29 – 1.52)     |
| Asian                                        | 8.6                                          | 1.57 (1.44 – 1.71)    |
| Other                                        | 6.7                                          | 1.12 (0.92 – 1.38)    |
| Unknown                                      | 5.6                                          | 0.88 (0.61 – 1.28)    |
| Prepartum Hb level (g/dl):                   |                                              |                       |
| ≥11 g/dl                                     | 5.3                                          | Reference             |
| 10 – 10.9 g/dl                               | 20.8                                         | 5.38 (4.89 – 5.91)    |
| <10 g/dl                                     | 54.5                                         | 30.6 (27.1 – 34.6)    |
| Hb missing                                   | 5.5                                          | 1.54 (1.42 – 1.67)    |
| Hereditary or acquired coagulation disorder† | 50.5                                         | 8.52 (6.0 – 12.1)     |
| Gestational age at delivery:                 |                                              |                       |
| <37 weeks                                    | 7.9                                          | Reference             |
| 37-41 weeks                                  | 7.1                                          | 1.49 (1.18 – 1.88)    |
| >41 weeks                                    | 10                                           | 1.81 (1.39 – 2.35)    |
| Grand multiparity†                           | 16.4                                         | 1.74 (1.1 – 2.73)     |
| Number of prior CSs:                         |                                              |                       |
| 0                                            | 7.5                                          | Reference             |
| 1                                            | 5.7                                          | 0.88 (0.8 – 0.98)     |
| ≥2                                           | 7.1                                          | 1.16 (0.86 – 1.56)    |
| Obesity†                                     | 6.4                                          | 0.79 (0.72 – 0.87)    |
| Thrombocytopenia†                            | 11.5                                         | 1.6 (1.33 – 1.93)     |
| Preeclampsia†                                | 11.9                                         | 1.49 (1.32 – 1.67)    |
| Labor†                                       | 9.3                                          | 1.73 (1.61 – 1.85)    |
| Placenta previa†                             | 13.3                                         | 1.41 (1.15 – 1.73)    |
| Antepartum hemorrhage †                      | 16.5                                         | 1.9 (1.58 – 2.27)     |
| Postpartum hemorrhage †                      | 31.8                                         | 8.45 (7.8 – 9.16)     |
| RBC transfusion†                             | 79.5                                         | -                     |

Row percentages are presented, where appropriate.

\*adjusted for year of birth.

**Table S3. Associations between Severe Postpartum Anemia with Postpartum Hemorrhage and Predelivery Hemoglobin Level Stratified by Receipt and Non-Receipt of Transfusion.**

|                                     | Received RBC Transfusion            |                                    |                           | Did Not Receive RBC Transfusion        |                                    |                           |
|-------------------------------------|-------------------------------------|------------------------------------|---------------------------|----------------------------------------|------------------------------------|---------------------------|
|                                     | No Severe Postpartum Anemia (n=364) | Severe Postpartum Anemia (n=1,183) | aOR (95% CI) <sup>a</sup> | No Severe Postpartum Anemia (n=65,432) | Severe Postpartum Anemia (n=3,960) | aOR (95% CI) <sup>b</sup> |
| <b>PPH*</b>                         | 256 (70.3%)                         | 672 (56.8%)                        | 0.64<br>(0.49 – 0.84)     | 2,888<br>(4.4%)                        | 794 (20.1%)                        | 6.03<br>(5.48 – 6.65)     |
| <b>Predelivery Hb level (g/dl):</b> |                                     |                                    |                           |                                        |                                    |                           |
| <b>&gt; 11</b>                      | 220 (60.4%)                         | 605 (51.2%)                        | Reference                 | 40,377<br>(61.7%)                      | 1,659<br>(41.9%)                   | Reference                 |
| <b>10 -10.9</b>                     | 34 (9.3%)                           | 166 (14%)                          | 2.12<br>(1.37 – 3.26)     | 3,233<br>(4.9%)                        | 691 (17.5%)                        | 5.78<br>(5.22 – 6.4)      |
| <b>&lt; 10</b>                      | 29 (8%)                             | 148 (12.5%)                        | 1.77<br>(1.11 – 2.81)     | 632 (1%)                               | 645 (16.3%)                        | 33.14<br>(29.12 – 37.72)  |
| <b>Missing Hb</b>                   | 81 (22.3%)                          | 264 (22.3%)                        | 1.45<br>(1.03 – 2.04)     | 21,190<br>(32.4%)                      | 965 (24.4%)                        | 1.59<br>(1.45 – 1.74)     |

PPH = Postpartum Hemorrhage; RBC = Red Blood Cells

\*PPH was identified using *International Classification of Diseases, 9<sup>th</sup> Revision, Clinical Modification* Codes.

<sup>a</sup> Adjusted odds ratio calculated from multivariate logistic regression, adjusting for year of birth, maternal age, race/ethnicity, grand multiparity, hereditary or acquired coagulation disorders, gestational age at delivery, number of prior cesarean deliveries, obesity, thrombocytopenia, pre-eclampsia, labor, placenta previa, antepartum hemorrhage, and transfusion as fixed effects, and individual hospital as a random effect.

<sup>b</sup> Adjusted odds ratio calculated from multivariate logistic regression, adjusting for year of birth, maternal age, race/ethnicity, grand multiparity, hereditary or acquired coagulation disorders, gestational age at delivery, number of prior cesarean deliveries, obesity, thrombocytopenia, pre-eclampsia, labor, placenta previa, and antepartum hemorrhage as fixed effects, and individual hospital as a random effect.

aOR = adjusted odds ratio; CI = confidence interval

**Table S4. Sensitivity Analyses Examining the Associations between Severe Postpartum Anemia with Predelivery Hemoglobin Levels and Estimated Blood Loss for Women undergoing Cesarean Section between 2010 and 2013.**

|                                     | <b>aOR (95% CI)<sup>a</sup></b> |
|-------------------------------------|---------------------------------|
| <b>Estimated Blood Loss (ml):</b>   |                                 |
| < 1000                              | Reference                       |
| 1000 - 1499                         | 3.85 (3.44 – 4.32)              |
| ≥ 1500                              | 13.45 (11.57 – 15.63)           |
| <b>Predelivery Hb level (g/dl):</b> |                                 |
| > 11                                | Reference                       |
| 10 - 10.9                           | 5.58 (4.83 – 6.45)              |
| < 10                                | 34.6 (28.52 – 41.92)            |
| <b>Missing Hb</b>                   | 1.61 (1.42 – 1.83)              |

<sup>a</sup> Adjusted odds ratio calculated from multivariate logistic regression, adjusting for year of birth, maternal age, race/ethnicity, grand multiparity, hereditary or acquired coagulation disorders, gestational age at delivery, number of prior cesarean deliveries, obesity, thrombocytopenia, pre-eclampsia, labor, placenta previa, antepartum hemorrhage as fixed effects, and individual hospital as a random effect.

aOR = adjusted odds ratio; CI = confidence interval; PPH = postpartum hemorrhage

**Table S5. Patient Characteristics of 13,086 Women who did not undergo Postpartum Hemoglobin Testing after Cesarean Section between 2005 and 2013\***

| Patient Characteristics                      | Postpartum Hb not measured (n=13,086) | Adjusted Odds Ratio (95% CI) |
|----------------------------------------------|---------------------------------------|------------------------------|
| Maternal Age (y)                             |                                       |                              |
| <20                                          | 320 (2.4%)                            | 0.89 (0.69 – 1.14)           |
| 20-34                                        | 7978 (61%)                            | Reference                    |
| ≥35                                          | 4788 (36.6%)                          | 1.37 (1.28 – 1.48)           |
| Race/Ethnicity                               |                                       |                              |
| White                                        | 5175 (39.5%)                          | Reference                    |
| Black                                        | 1361 (10.4%)                          | 0.98 (0.86 – 1.12)           |
| Hispanic                                     | 2923 (22.3%)                          | 0.81 (0.74 – 0.89)           |
| Asian                                        | 2952 (22.6%)                          | 0.83 (0.76 – 0.92)           |
| Other                                        | 377 (2.9%)                            | 0.89 (0.72 – 1.10)           |
| Unknown                                      | 298 (2.3%)                            | 3.87 (3.02 – 4.96)           |
| Prepartum Hb level (g/dl)                    |                                       |                              |
| ≥11 g/dl                                     | 1486 (11.4%)                          | Reference                    |
| 10 – 10.9 g/dl                               | 180 (1.4%)                            | 0.86 (0.70 – 1.04)           |
| <10 g/dl                                     | 95 (0.7%)                             | 1.54 (1.18 – 2.00)           |
| Hb missing                                   | 11,325 (86.5%)                        | 3.67 (3.39 – 3.98)           |
| Hereditary or acquired coagulation disorder† | 67 (0.5%)                             | 0.78 (0.41 – 1.48)           |
| Gestational age at delivery:                 |                                       |                              |
| <37 weeks                                    | 10662 (81.5%)                         | 156.9 (142.99 – 169.97)      |
| 37-41 weeks                                  | 2382 (18.2%)                          | Reference                    |
| >41 weeks                                    | 42 (0.3%)                             | 0.35 (0.26 – 0.49)           |
| Grand multiparity†                           | 60 (0.5%)                             | 1.15 (0.68 – 1.95)           |
| Number of prior CSs                          |                                       |                              |
| 0                                            | 12,358 (94.4%)                        | Reference                    |
| 1                                            | 689 (5.3%)                            | 0.15 (0.13 – 0.17)           |
| ≥2                                           | 39 (0.3%)                             | 0.07 (0.04 – 0.10)           |
| Obesity†                                     | 1866 (14.4%)                          | 0.88 (0.80 – 0.98)           |
| Thrombocytopenia†                            | 505 (3.9%)                            | 1.96 (1.56 – 2.46)           |
| Preeclampsia†                                | 3195 (24.4%)                          | 1.39 (1.24 – 1.56)           |
| Labor†                                       | 4098 (31.3%)                          | 0.81 (0.75 – 0.87)           |
| Placenta Previa†                             | 757 (5.8%)                            | 0.61 (0.50 – 0.74)           |
| Antepartum hemorrhage†                       | 1218 (9.3%)                           | 0.92 (0.77 – 1.10)           |
| Coagulopathy†                                | 145 (1.1%)                            | 0.57 (0.37 – 0.88)           |
| PPH†                                         | 1196 (9.1%)                           | 1.49 (1.30 – 1.71)           |
| Blood transfusion†                           | 796 (6.1%)                            | 1.71 (1.41 – 2.09)           |

\* Denominator consists of 70,939 patients (Figure 1); dependent variable is absence of postpartum hemoglobin testing (N = 13,086)

† Data for these variables were identified using *International Classification of Diseases, 9<sup>th</sup> Revision, Clinical Modification* Diagnosis and Procedure Codes.

Adjusted odds ratios and 95% confidence intervals are presented to show the risk of not undergoing postpartum hemoglobin testing for each characteristic. All characteristics were included in a multivariate logistic model, in addition to year of birth as a fixed effect and individual hospital as a random effect.

Data presented as n (%). Column percentages are presented, where appropriate.

aOR = adjusted odds ratio from hierarchical logistic regression; CI = confidence intervals; CS = Cesarean section; Hb = hemoglobin.

Model discrimination was assessed by calculating the area under the receiver operating characteristics curve (AUROC); AUROC = 0.933; 95% CI=0.929 – 0.935

**Table S6. Characteristics of 5,843 Women with Missing Postpartum Hemoglobin Values who underwent Cesarean Section between 2010 and 2013.**

|                                  | Patients with Missing Hb at Discharge <sup>a</sup> |      |
|----------------------------------|----------------------------------------------------|------|
|                                  | N                                                  | %    |
| <b>No Predelivery Anemia</b>     |                                                    |      |
| No PPH:                          |                                                    |      |
| Not Transfused                   | 306                                                | 5.24 |
| Transfused                       | 5                                                  | 0.09 |
| PPH:                             |                                                    |      |
| Not Transfused                   | 150                                                | 2.57 |
| Transfused                       | 7                                                  | 0.12 |
| Severe PPH:                      |                                                    |      |
| Not Transfused                   | 35                                                 | 0.6  |
| Transfused                       | 20                                                 | 0.34 |
| No Documented EBL:               |                                                    |      |
| Not Transfused                   | 83                                                 | 1.42 |
| Transfused                       | 3                                                  | 0.05 |
| <b>Mild Predelivery Anemia</b>   |                                                    |      |
| No PPH:                          |                                                    |      |
| Not Transfused                   | 35                                                 | 0.6  |
| Transfused                       | 0                                                  | 0    |
| PPH:                             |                                                    |      |
| Not Transfused                   | 23                                                 | 0.39 |
| Transfused                       | 3                                                  | 0.05 |
| Severe PPH:                      |                                                    |      |
| Not Transfused                   | 3                                                  | 0.05 |
| Transfused                       | 2                                                  | 0.03 |
| No Documented EBL:               |                                                    |      |
| Not Transfused                   | 7                                                  | 0.12 |
| Transfused                       | 0                                                  | 0    |
| <b>Severe Predelivery Anemia</b> |                                                    |      |
| No PPH:                          |                                                    |      |
| Not Transfused                   | 17                                                 | 0.29 |
| Transfused                       | 0                                                  | 0    |
| PPH:                             |                                                    |      |
| Not Transfused                   | 7                                                  | 0.12 |
| Transfused                       | 4                                                  | 0.07 |
| Severe PPH:                      |                                                    |      |
| Not Transfused                   | 2                                                  | 0.03 |
| Transfused                       | 1                                                  | 0.02 |
| No Documented EBL:               |                                                    |      |
| Not Transfused                   | 5                                                  | 0.09 |

|                          |       |      |
|--------------------------|-------|------|
| Transfused               | 1     | 0.02 |
| <b>No Predelivery Hb</b> |       |      |
| No PPH:                  |       |      |
| Not Transfused           | 3,313 | 56.7 |
| Transfused               | 117   | 2    |
| PPH:                     |       |      |
| Not Transfused           | 923   | 15.8 |
| Transfused               | 85    | 1.45 |
| Severe PPH:              |       |      |
| Not Transfused           | 195   | 3.34 |
| Transfused               | 123   | 2.11 |
| No Documented EBL:       |       |      |
| Not Transfused           | 337   | 5.77 |
| Transfused               | 31    | 0.53 |

<sup>a</sup>This cohort consists of 5,843 women among the 38,086 women who underwent cesarean section between 2010 and 2013; this subset did not have a recorded postpartum hemoglobin value.

Column percentages are presented, where appropriate.

EBL = estimated blood loss; Hb = hemoglobin; PPH = postpartum hemorrhage
